# Supplementary material for: BNIP3 promotes HIF‐1α‐driven melanoma growth by curbing intracellular iron homeostasis
Source: PubMed Central journal article supplement — EMBO J. 2021 May 1;40(10):e106214. doi: 10.15252/embj.2020106214 (PMC8126921; doi:10.15252/embj.2020106214), 2021-05-01
Supplement: EMBJ-40-e106214-s002.pdf [file EMBJ-40-e106214-s002.pdf]

Appendix of the manuscript: **BNIP3 promotes HIF-1 $\alpha$ -driven melanoma growth by curbing intracellular iron homeostasis** by Vara-Perez M. *et al.*

**Appendix Figures S1-3**

**Appendix Tables S1-5**

**References**

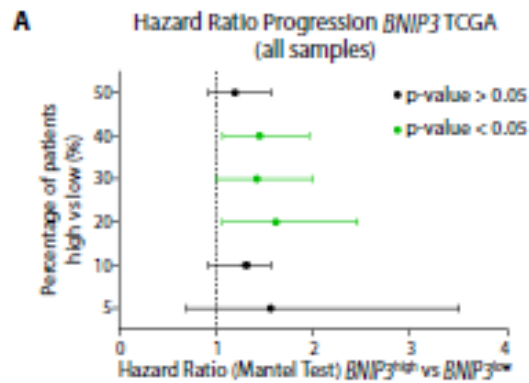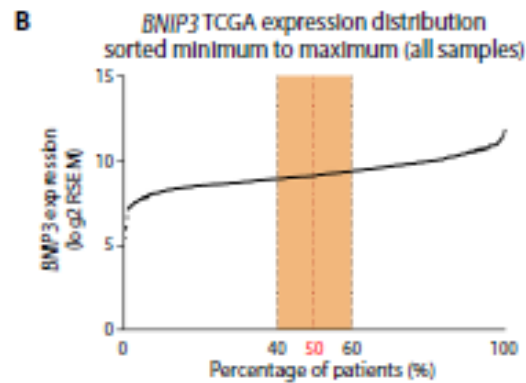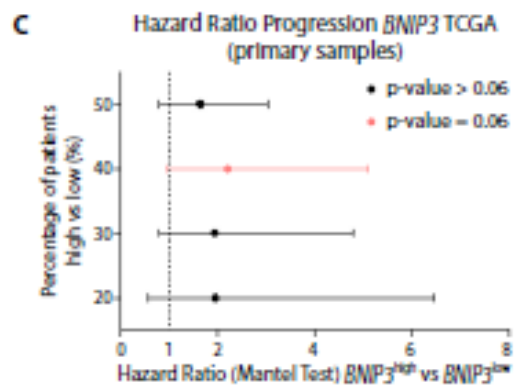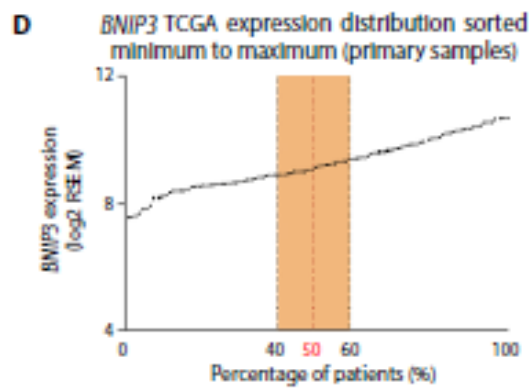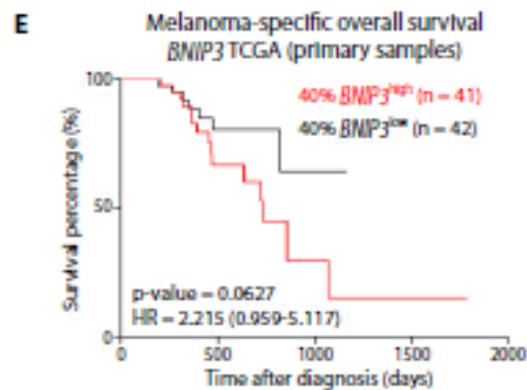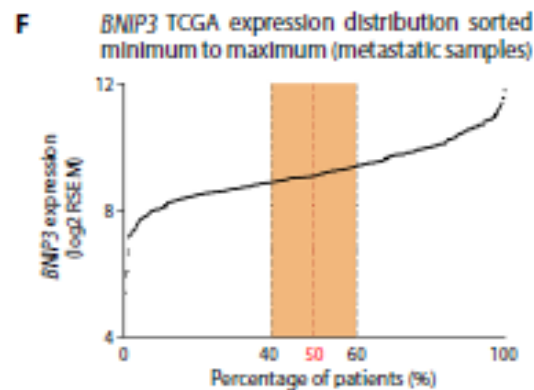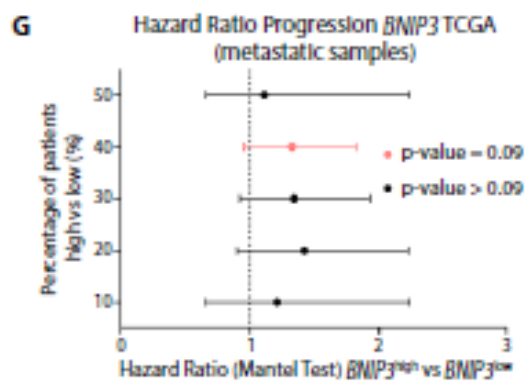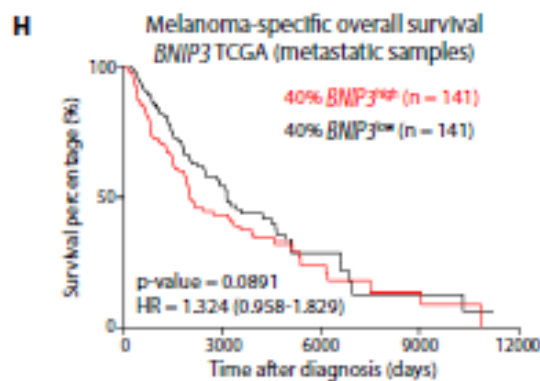

**Appendix Figure S1. BNIP3 levels in melanoma inversely correlate with patient's prognosis (related to Figure 1).**

- (A) Hazard ratio analysis of all the specimens of the SKCM cohort (n=469) from the TCGA, segregated in *BNIP3* highest and lowest levels using different cut-offs (50% cut-off takes the 50% of the samples harboring the highest *BNIP3* levels and compares them against the other 50% with the lowest *BNIP3* levels, 40% compares the 40% highest with the 40% lowest, and so forth).
- (B) Distribution of *BNIP3* levels within the SKCM cohort (n=469) from the TCGA, sorted from minimum to maximum.
- (C) Hazard ratio analysis of the primary samples of the SKCM cohort (n=103) from the TCGA, segregated in *BNIP3* highest and lowest levels using different cut-offs (alike in Fig. S1A).
- (D) Distribution of *BNIP3* levels within the primary samples of the SKCM cohort (n=103) from the TCGA, sorted from minimum to maximum.
- (E) Kaplan Meier representing the survival difference between the SKCM primary samples with the 40% highest *BNIP3* values against the samples with the lowest 40% *BNIP3* levels.
- (F) Hazard ratio analysis of the metastatic samples of the SKCM cohort (n=366) from the TCGA, segregated in *BNIP3* highest and lowest levels using different cut-offs (alike in Fig. S1A).
- (G) Distribution of *BNIP3* levels within the metastatic samples of the SKCM cohort (n=366) from the TCGA, sorted from minimum to maximum.
- (H) Kaplan Meier plot representing the survival difference between the SKCM metastatic samples with the 40% highest *BNIP3* values against the samples with the lowest 40% *BNIP3* levels.

Data information: Hazard ratios were calculated using the Mantel-Haenszel test and corresponding p-values using the log-rank (Mantel-Cox) test. Both Kaplan Meier curves were analyzed using the log-rank (Mantel-Cox) test.

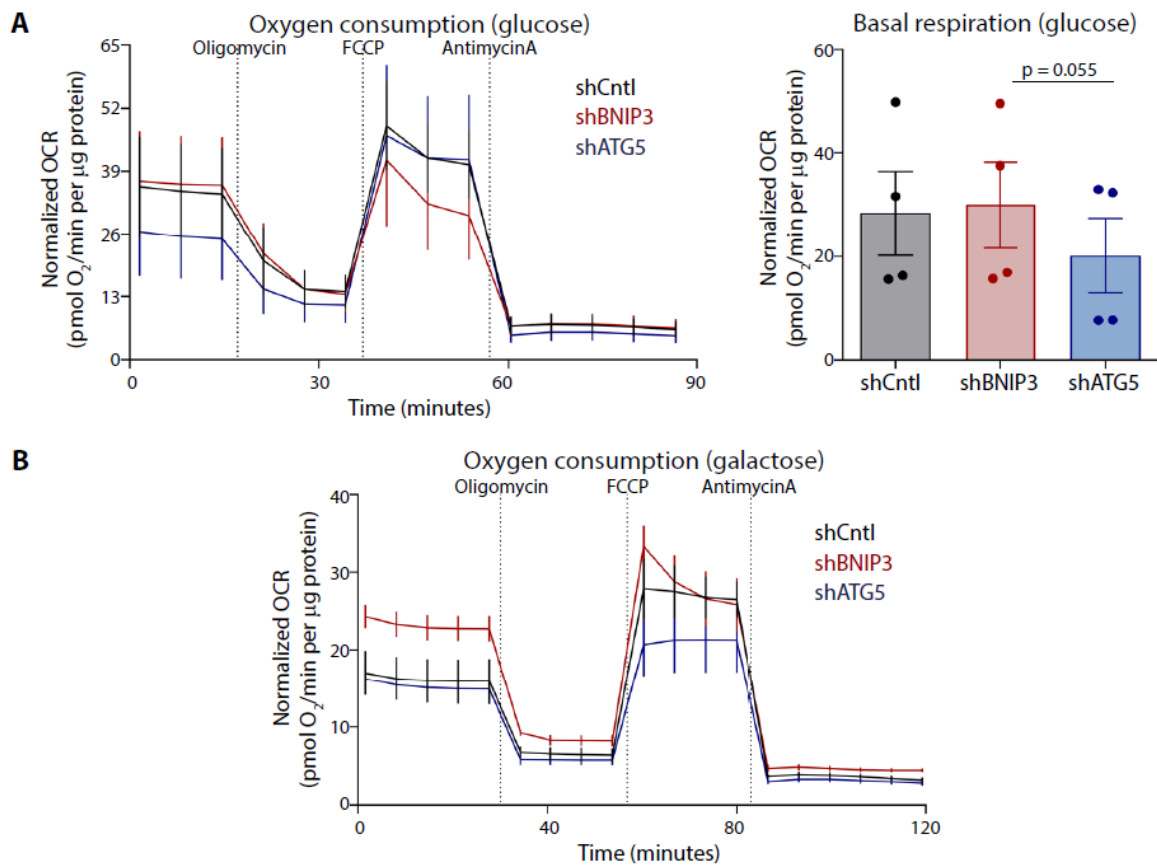

**Appendix Figure S2. BNIP3 loss rewires melanoma cell's metabolism (related to Figure 3).**

(A-B) OCR per μg of protein of B16-F10 cells assayed in either glucose (A; 25mM glucose, 2mM glutamine; n=4) or galactose (B; 25mM galactose, 2mM glutamine; n=3) medium using the Seahorse technology. Basal respiration (glucose) was analyzed using a RM one-way ANOVA (Geisser-Greenhouse correction) with Holm-Sidak's multiple comparisons test

Data information: All quantitative data are mean ± SEM. # p < 0.05 when compared against shCntl.

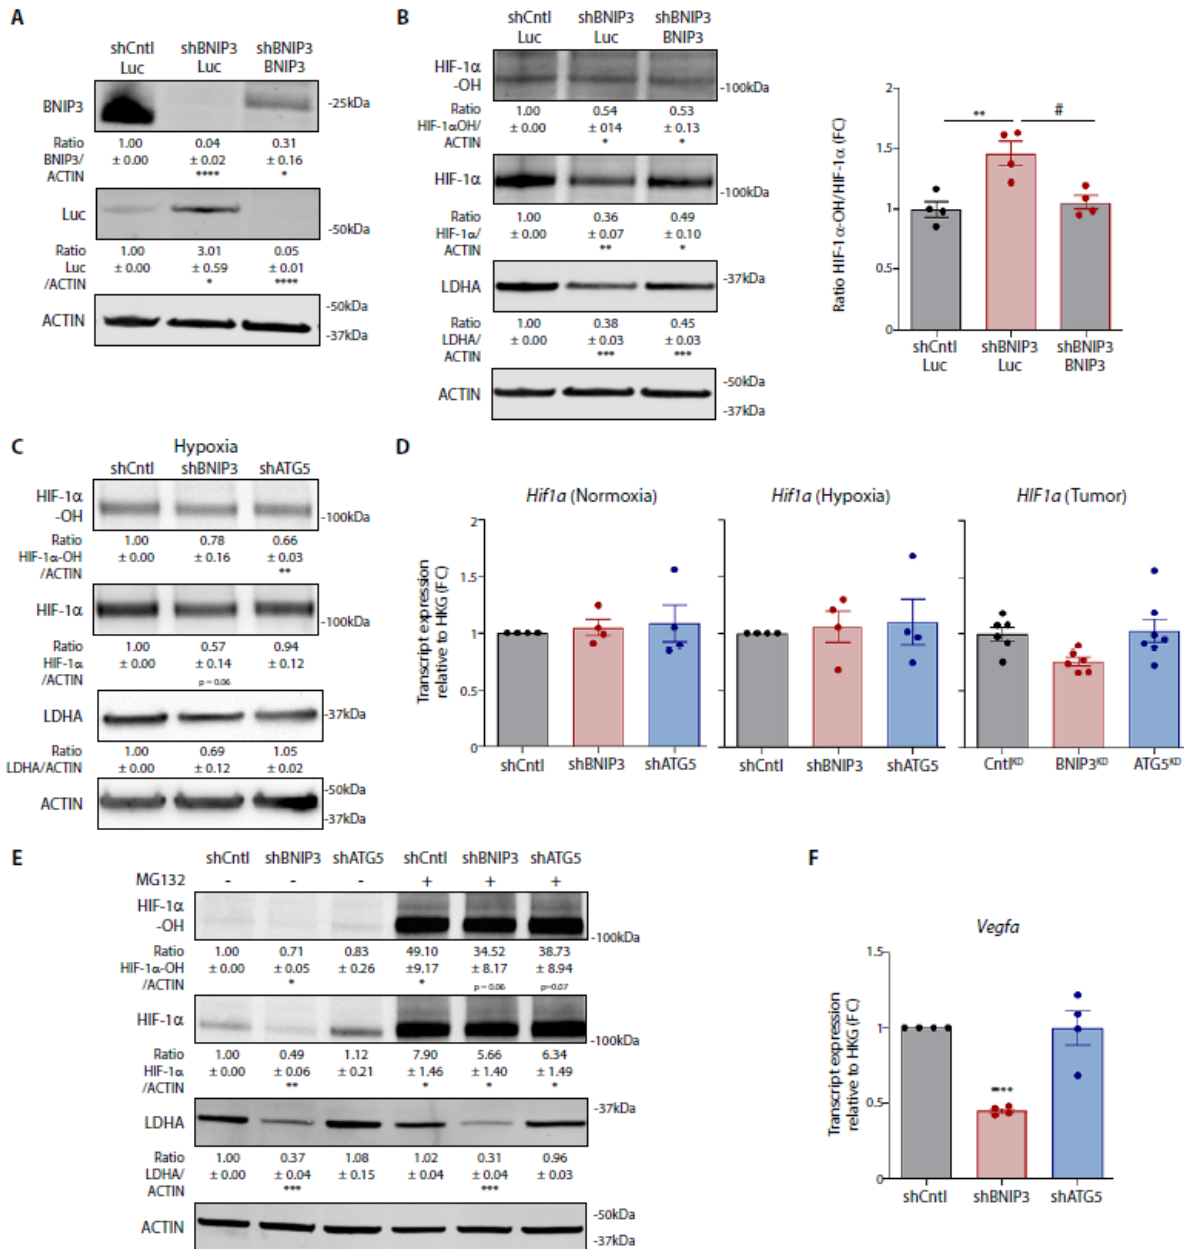

**Appendix Figure S3. BNIP3 stabilizes normoxic HIF-1α on a post-translational level in murine melanoma cells (related to Figure 4).**

**(A-B)** Immunoblot detection of BNIP3, luciferase (Luc) and ACTIN (A) or hydroxylated HIF-1α (HIF-1α-OH), total HIF-1α, LDHA and ACTIN (B) protein levels from lysates of B16-F10 cells lentivirally transduced with either Luc (shCntl Luc, shBNIP3 Luc) or a BNIP3-FL (shBNIP3 BNIP3) construct. The HIF-1α-OH /HIF-1α ratio is shown in a bar graph below. Densitometric quantifications relative to ACTIN levels are shown below each corresponding band.

**(C)** Immunoblot detection of hydroxylated HIF-1α (HIF-1α-OH), total HIF-1α, LDHA and ACTIN protein levels from lysates of B16-F10 cells collected after 24h of hypoxic (1% O<sub>2</sub>) exposure.

- (D) *Hif1a* transcript levels from lysates of normoxic, hypoxic or tumor B16-F10 cells [Cntl<sup>KD</sup> (n=6), BNIP3<sup>KD</sup> (n=6) and ATG5<sup>KD</sup> (n=7)].
- (E) Immunoblot detection of hydroxylated HIF-1 $\alpha$  (HIF-1 $\alpha$ -OH), total HIF-1 $\alpha$ , LDHA and ACTIN protein levels from normoxic lysates of B16-F10 cells cultured in the presence or absence of the proteasomal inhibitor MG132 (10nM) for 6h.
- (F) *Vegfa* transcript levels in lysates from normoxic B16-F10 cells.

Data information: All quantitative data are mean  $\pm$  SEM. Densitometric quantifications of all protein levels are shown below the corresponding band \*p < 0.05, \*\*p < 0.01, \*\*\*p < 0.001, \*\*\*\*p < 0.0001 when compared against shCntl. Unless otherwise stated, each graph represents n=4 biologically independent experiments analyzed using a one-sample T-test against shCntl.

**Appendix Table S1. Patient information (related to Figure 1).**

| Patient data Figure 1C - paired primary and metastases |                  |        |      |           |                           |            |         |            |
|--------------------------------------------------------|------------------|--------|------|-----------|---------------------------|------------|---------|------------|
| Patient                                                | Age at diagnosis | Gender | Type | TILS      | Breslow from primary (mm) | Ulceration | Mitoses | Regression |
| 1                                                      | 87               | F      | SSMM | non-brisk | 1,73                      | no         | 1-6     | no         |
| 2                                                      | 74               | M      | ALMM | non-brisk | 3,25                      | yes        | 1-6     | no         |
| 3                                                      | 64               | F      | NMM  | non-brisk | 1,58                      | no         | 1-6     | no         |
| 4                                                      | 66               | F      | ALMM | non-brisk | 4,00                      | yes        | > 6     | no         |
| 5                                                      | 47               | M      | SSMM | non-brisk | 1,44                      | no         | 1-6     | no         |
| 6                                                      | 58               | M      | SSMM | non-brisk | 3,68                      | yes        | > 6     | no         |
| 7                                                      | 58               | M      | SSMM | non-brisk | 3,20                      | yes        | > 6     | no         |

| Patient data Figure 1D - TMA |                         |        |                                     |              |              |                 |                    |                 |              |
|------------------------------|-------------------------|--------|-------------------------------------|--------------|--------------|-----------------|--------------------|-----------------|--------------|
| Sample                       | Age at time of sampling | Gender | Type 1st metastases                 | Site primary | Type primary | Breslow primary | Ulceration primary | Mitoses primary | TILS primary |
| <b>BNIP3 score = 0</b>       |                         |        |                                     |              |              |                 |                    |                 |              |
| 1                            | 88                      | F      | in transit metastases               | foot         | ALMM         | 6,2             | NA                 | NA              | NA           |
| <b>BNIP3 score = 1</b>       |                         |        |                                     |              |              |                 |                    |                 |              |
| 2                            | 55                      | F      | LN metastases                       | lower leg    | SSMM         | 0,7             | +                  | NA              | NA           |
| 3                            | 44                      | F      | lung, spleen adrenal, LN metastases | shoulder     | MMnos        | NA              | NA                 | NA              | NA           |
| 4                            | 47                      | F      | LN metastases                       | trunk        | SSMM         | 1               | NA                 | NA              | NA           |
| 5                            | 89                      | F      | LN metastases                       | conjunctiva  | MMnos        | NA              | NA                 | NA              | NA           |
| 6                            | 38                      | F      | LN metastases                       | arm          | SSMM         | 1               | NA                 | NA              | NA           |
| 7                            | 88                      | F      | in transit metastases               | foot         | ALMM         | 1,8             | +                  | NA              | NA           |
| 8                            | 30                      | F      | LN metastases                       | unknown      | NMM          | 20              | NA                 | NA              | NA           |
| 9                            | 69                      | F      | local cutaneous metastases          | unknown      | SSMM         | 1,92            | NA                 | NA              | NA           |
| 10                           | 52                      | F      | LN metastases                       | foot         | SSMM         | 3,68            | +                  | >6              | 0            |
| 11                           | 60                      | F      | LN metastases                       | arm          | NMM          | 2,8             | +                  | >1 <6           | non-brisk    |

|                        |    |   |                                 |           |               |      |    |    |                 |
|------------------------|----|---|---------------------------------|-----------|---------------|------|----|----|-----------------|
| 12                     | 50 | F | LN metastases                   | knee      | SSMM          | 1,6  | NA | NA | NA              |
| 13                     | 76 | F | LN metastases                   | lower leg | SSMM          | 1,25 | NA | NA | NA              |
| <b>BNIP3 score = 2</b> |    |   |                                 |           |               |      |    |    |                 |
| 14                     | 75 | F | LN metastases                   | lower leg | SSMM          | NA   | NA | NA | NA              |
| 15                     | 68 | F | LN metastases                   | lower leg | NMM           | 1,9  | NA | NA | NA              |
| 16                     | 61 | F | local recurrence                | foot      | MMnos         | 1    | NA | NA | NA              |
| 17                     | 70 | F | abdominal metastases            | trunk     | SSMM          | 1,4  | NA | NA | NA              |
| 18                     | 61 | F | local recurrence                | foot      | MMnos         | 1    | NA | NA | NA              |
| 19                     | 36 | F | LN metastases                   | lower leg | NMM           | 1,1  | NA | NA | NA              |
| 20                     | 43 | F | LN metastases                   | shoulder  | SSMM          | 0,39 | NA | NA | NA              |
| 21                     | 30 | F | LN metastases                   | thigh     | MMnos         | 12   | NA | NA | NA              |
| 22                     | 27 | F | LN metastases                   | leg       | NMM           | 2,01 | NA | NA | NA              |
| 23                     | 62 | F | in transit, LN, lung metastases | nail toe  | ALMM          | NA   | NA | NA | NA              |
| 24                     | 34 | F | LN metastases                   | back      | SSMM          | 1,1  | NA | NA | NA              |
| 25                     | 68 | F | LN metastases                   | lower leg | SSMM          | 18   | +  | NA | microsa tellite |
| 26                     | 43 | F | LN metastases                   | back      | SSMM          | 3,06 | NA | NA | NA              |
| 27                     | 34 | F | local cutaneous metastases      | lower leg | NMM           | 2,1  | NA | NA | NA              |
| 28                     | 51 | F | LN metastases                   | unknown   | LN metastases | NA   | NA | NA | NA              |
| 29                     | 51 | F | LN metastases                   | unknown   | LN metastases | NA   | NA | NA | NA              |
| 30                     | 38 | F | LN metastases                   | arm       | SSMM          | 1    | NA | NA | NA              |
| 31                     | 63 | F | NA                              | upper leg | SSMM          | 1,6  | NA | NA | NA              |



|    |    |   |                                  |           |       |       |    |             |               |
|----|----|---|----------------------------------|-----------|-------|-------|----|-------------|---------------|
| 32 | 77 | F | local<br>cutaneous<br>metastases | lower leg | SSMM  | 1,9   | NA | NA          | NA            |
| 33 | 61 | F | intestinal<br>metastases         | lower leg | MMnos | NA    | NA | NA          | NA            |
| 34 | 43 | F | LN<br>metastases                 | shoulder  | SSMM  | 1,4   | NA | NA          | NA            |
| 35 | 51 | F | LN<br>metastases                 | arm       | SSMM  | 1,125 | -  | ++          | non-<br>brisk |
| 36 | 36 | F | LN<br>metastases                 | lower leg | NMM   | 5     | NA | NA          | NA            |
| 37 | 71 | F | local<br>cutaneous<br>recurrence | lower leg | MMnos | 5,5   | NA | NA          | NA            |
| 38 | 48 | F | LN<br>metastases                 | unknown   | MMnos | NA    | NA | NA          | NA            |
| 39 | 52 | F | LN<br>metastases                 | trunk     | SSMM  | 0,44  | NA | NA          | NA            |
| 40 | 52 | F | LN<br>metastases                 | lower leg | SSMM  | 1,06  | NA | NA          | NA            |
| 41 | 55 | F | LN<br>metastases                 | lower leg | MMnos | 1,6   | NA | NA          | NA            |
| 42 | 55 | F | LN<br>metastases                 | lower leg | MMnos | 1,6   | NA | NA          | NA            |
| 43 | 58 | F | LN<br>metastases                 | vulva     | SSMM  | 4,5   | NA | NA          | NA            |
| 44 | 70 | F | LN<br>metastases                 | unknown   | MMnos | 4,1   | NA | NA          | NA            |
| 45 | 39 | F | LN<br>metastases                 | lower leg | NMM   | 12    | +  | >6          | 0             |
| 46 | 36 | F | LN<br>metastases                 | lower leg | SSMM  | 2,08  | NA | NA          | NA            |
| 47 | 69 | F | in transit<br>metastases         | lower leg | SSMM  | 1,9   | -  | unknow<br>n | unknow<br>n   |
| 48 | 40 | F | breast<br>metastases             | arm       | SSMM  | 0,69  | -  | unknow<br>n | brisk         |
| 49 | 39 | F | brain<br>metastases              | back      | SSMM  | 1,28  | -  | >1 <6       | brisk         |
| 50 | 80 | F | LN<br>metastases                 | arm       | MMnos | 2,75  | +  | >6          | brisk         |
| 51 | 69 | F | LN<br>metastases                 | arm       | SSMM  | 10,9  | -  | >6          | non-<br>brisk |
| 52 | 55 | F | local<br>recurrence              | ear       | NMM   | 2,4   | NA | NA          | NA            |

|                        |    |   |                           |           |       |      |    |       |    |
|------------------------|----|---|---------------------------|-----------|-------|------|----|-------|----|
| 53                     | 51 | F | LN metastases             | lower leg | ALMM  | 1,92 | NA | NA    | NA |
| 54                     | 65 | F | LN metastases             | upper leg | NMM   | 3,1  | NA | NA    | NA |
| 55                     | 49 | F | LN metastases             | back      | NMM   | 5,6  | NA | NA    | NA |
| 56                     | 75 | F | LN metastases             | trunk     | NMM   | 3,3  | NA | NA    | NA |
| 57                     | 39 | F | LN metastases             | upper arm | SSMM  | 1,25 | NA | NA    | NA |
| 58                     | 59 | F | LN metastases             | trunk     | SSMM  | 1,39 | NA | NA    | NA |
| 59                     | 86 | F | in transit metastases     | lower leg | MMnos | 8    | NA | NA    | NA |
| 60                     | 71 | F | LN metastases             | lower leg | SSMM  | 0,93 | -  | 0     | NA |
| 61                     | 54 | F | in transit metastases     | foot      | SSMM  | 3,5  | +  | NA    | NA |
| 62                     | 61 | F | in transit metastases     | lower leg | SSMM  | 2,6  | NA | NA    | NA |
| 63                     | 81 | F | in transit metastases     | teen      | SSMM  | 1,06 | -  | >1 <6 | 0  |
| 64                     | 76 | F | LN metastases             | face      | SSMM  | 0,55 | NA | NA    | NA |
| 65                     | 88 | F | salivary gland metastases | face      | MMnos | NA   | NA | NA    | NA |
| 66                     | 61 | F | LN metastases             | lower leg | SSMM  | 2,24 | NA | NA    | NA |
| <b>BNIP3 score = 3</b> |    |   |                           |           |       |      |    |       |    |
| 67                     | 71 | F | local skin metastases     | lower leg | SSMM  | NA   | NA | NA    | NA |
| 68                     | 34 | F | LN metastases             | back      | SSMM  | 1,1  | NA | NA    | NA |
| 69                     | 71 | F | local skin metastases     | lower leg | SSMM  | NA   | NA | NA    | NA |
| 70                     | 58 | F | in transit metastases     | foot      | ALMM  | NA   | NA | NA    | NA |
| 71                     | 53 | F | LN metastases             | unknown   | SSMM  | 1    | NA | NA    | NA |
| 72                     | 46 | F | in transit metastases     | lower leg | MMnos | 2,75 | NA | NA    | NA |
| 73                     | 79 | F | LN metastases             | arm       | NMM   | 2,4  | NA | NA    | NA |
| 74                     | 77 | F | LN metastases             | face      | MMnos | 1,36 | NA | NA    | NA |

|    |    |   |                                      |              |               |       |         |         |           |
|----|----|---|--------------------------------------|--------------|---------------|-------|---------|---------|-----------|
| 75 | 76 | F | bone metastases                      | lower leg    | NA            | 4     | NA      | NA      | NA        |
| 76 | 47 | F | LN metastases                        | upper leg    | MMnos         | 5,6   | NA      | NA      | NA        |
| 77 | 36 | F | subcutaneous, LN metastases          | lower leg    | SSMM          | 1,04  | NA      | NA      | NA        |
| 78 | 72 | F | local cutaneous metastases           | lower leg    | SSMM          | 2,4   | NA      | NA      | NA        |
| 79 | 84 | F | nasal                                | nasal mucosa | MMnos         | NA    | NA      | NA      | NA        |
| 80 | 90 | F | LN metastases                        | toe          | ALMM          | NA    | NA      | NA      | NA        |
| 81 | 56 | F | nodal metastases                     | thigh        | SSMM          | 3,26  | unknown | unknown | unknown   |
| 82 | 61 | F | NA                                   | axilla       | LN metastases | NA    | NA      | NA      | NA        |
| 83 | 39 | F | LN metastases                        | lower leg    | SSMM          | 1,1   | NA      | NA      | NA        |
| 84 | 49 | F | LN metastases                        | arm          | SSMM          | 1,125 | -       | ++      | non-brisk |
| 85 | 71 | F | cutaneous metastases                 | lower leg    | NMM           | 3     | +       | NA      | NA        |
| 86 | 60 | F | LN metastases                        | nail toe     | ALMM          | 3,8   | NA      | NA      | NA        |
| 87 | 36 | F | local cutaneous metastases           | lower leg    | NMM           | 2,1   | NA      | NA      | NA        |
| 88 | 72 | F | cutaneous metastases                 | lower leg    | NMM           | 3     | +       | NA      | NA        |
| 89 | 40 | F | lung, bone, LN metastases            | lower leg    | LN metastases | NA    | NA      | NA      | NA        |
| 90 | 79 | F | local cutaneous metastases           | unknown      | SSMM          | 3,46  | +       | >6      | absent    |
| 91 | 22 | F | in transit metastases, LN metastases | back         | NMM           | 11    | NA      | NA      | NA        |
| 92 | 42 | F | LN metastases                        | rectum       | MMnos         | NA    | NA      | NA      | NA        |

|     |    |   |                            |           |        |         |         |         |         |
|-----|----|---|----------------------------|-----------|--------|---------|---------|---------|---------|
| 93  | 60 | F | local cutaneous metastases | lower leg | MMnos  | NA      | NA      | NA      | NA      |
| 94  | 80 | F | local cutaneous metastases | unknown   | SSMM   | 3,46    | +       | >6      | absent  |
| 95  | 88 | F | local skin metastases      | lower leg | NMM    | unknown | unknown | unknown | unknown |
| 96  | 80 | F | local cutaneous metastases | unknown   | SSMM   | 3,46    | +       | >6      | absent  |
| 97  | 45 | F | abdominal metastases       | upper arm | SSMM   | 1,2     | NA      | NA      | NA      |
| 98  | 76 | F | local skin metastases      | lower leg | SSMM   | NA      | NA      | NA      | NA      |
| 99  | 66 | F | in transit metastases      | lower leg | SSMM   | 1,9     | -       | unknown | unknown |
| 100 | 62 | F | LN metastases              | lower leg | SSMM   | 0,8     | NA      | NA      | NA      |
| 101 | 93 | F | in transit metastases      | unknown   | NMM    | 5       | NA      | NA      | NA      |
| 102 | 50 | F | in transit metastases      | lower leg | MMnos  | 2,75    | NA      | NA      | NA      |
| 103 | 88 | F | local skin metastases      | lower leg | NMM    | unknown | unknown | unknown | unknown |
| 104 | 41 | F | lung metastases            | vulva     | SSMM   | 5,1     | +       | NA      | NA      |
| 105 | 62 | F | local cutaneous metastases | lower leg | MMnos  | NA      | NA      | NA      | NA      |
| 106 | 72 | F | local cutaneous recurrence | lower leg | MM nos | 5,5     | NA      | NA      | NA      |
| 107 | 81 | F | local cutaneous metastases | unknown   | SSMM   | 3,46    | +       | >6      | absent  |
| 108 | 42 | F | lung metastases            | vulva     | SSMM   | 5,1     | +       | NA      | NA      |
| 109 | 43 | F | LN metastases              | unknown   | MMnos  | 7,2     | NA      | NA      | NA      |
| 110 | 89 | F | local skin metastases      | lower leg | NMM    | unknown | unknown | unknown | unknown |

|     |    |   |                                  |                     |       |      |         |             |               |
|-----|----|---|----------------------------------|---------------------|-------|------|---------|-------------|---------------|
| 111 | 38 | F | local<br>cutaneous<br>metastases | lower leg           | NMM   | 2,1  | NA      | NA          | NA            |
| 112 | 75 | F | cutaneous<br>metastases          | lower leg           | NMM   | 3    | +       | NA          | NA            |
| 113 | 72 | F | in transit<br>metastases         | lower leg           | MMnos | NA   | NA      | NA          | NA            |
| 114 | 75 | F | cutaneous<br>metastases          | lower leg           | NMM   | 3    | +       | NA          | NA            |
| 115 | 33 | F | LN<br>metastases                 | hand                | MMnos | 2,75 | -       | >6          | non-<br>brisk |
| 116 | 69 | F | cardiac<br>metastases            | hand                | SSMM  | 5,12 | +       | >6          | 0             |
| 117 | 25 | F | lung<br>metastases               | unknown             | MMnos | NA   | NA      | NA          | NA            |
| 118 | 37 | F | LN<br>metastases                 | neck                | SSMM  | 2,81 | unknown | unknow<br>n | unknow<br>n   |
| 119 | 71 | F | in transit<br>metastases         | unknown             | SSMM  | 1,3  | NA      | NA          | NA            |
| 120 | 30 | F | LN<br>metastases                 | lower leg           | MMnos | NA   | NA      | NA          | NA            |
| 121 | 69 | F | LN<br>metastases                 | lower leg           | SSMM  | 0,93 | -       | 0           | NA            |
| 122 | 42 | F | LN<br>metastases                 | upper<br>arm        | NMM   | 1,99 | NA      | NA          | NA            |
| 123 | 77 | F | cutaneous<br>metastases          | lower leg           | NMM   | 3    | +       | NA          | NA            |
| 124 | 77 | F | cutaneous<br>metastases          | lower leg           | NMM   | 3    | +       | NA          | NA            |
| 125 | 41 | F | local<br>cutaneous<br>metastases | lower leg           | NMM   | 2,1  | NA      | NA          | NA            |
| 126 | 41 | F | local<br>cutaneous<br>metastases | lower leg           | NMM   | 2,1  | NA      | NA          | NA            |
| 127 | 68 | F | local<br>recurrence              | neck                | MMnos | NA   | NA      | NA          | NA            |
| 128 | 34 | F | LN<br>metastases                 | lower leg           | SSMM  | 0,75 | NA      | NA          | NA            |
| 129 | 60 | F | LN<br>metastases                 | face                | MMnos | NA   | NA      | NA          | NA            |
| 130 | 51 | F | lung<br>metastases               | brain<br>metastases | NA    | NA   | NA      | NA          | NA            |

|     |    |   |                                    |                     |               |      |         |         |                    |
|-----|----|---|------------------------------------|---------------------|---------------|------|---------|---------|--------------------|
| 131 | 68 | F | LN<br>metastases,<br>satellite     | lower leg           | MMnos         | 3    | NA      | NA      | NA                 |
| 132 | 81 | F | vulvar<br>recurrence               | vulva               | MMnos         | 10   | NA      | NA      | NA                 |
| 133 | 73 | F | LN<br>metastases                   | upper leg           | SSMM          | 1,5  | NA      | NA      | NA                 |
| 134 | 52 | F | cutaneous<br>metastases            | lower leg           | MMnos         | 3,84 | NA      | NA      | NA                 |
| 135 | 49 | F | local<br>recurrence                | lower leg           | SSMM          | 4,4  | NA      | NA      | NA                 |
| 136 | 67 | F | in transit<br>metastases           | foot                | ALMM          | NA   | NA      | NA      | NA                 |
| 137 | 59 | F | LN<br>metastases                   | trunk               | SSMM          | 1,39 | NA      | NA      | NA                 |
| 138 | 79 | F | LN<br>metastases                   | brain<br>metastases | no<br>primary | NA   | NA      | NA      | NA                 |
| 139 | 63 | F | nodal, in<br>transit<br>metastases | lower leg           | NMM           | 3,5  | unknown | unknown | unknown            |
| 140 | 49 | F | local<br>recurrence                | lower leg           | SSMM          | 4,4  | NA      | NA      | NA                 |
| 141 | 79 | F | LN<br>metastases                   | brain<br>metastases | no<br>primary | NA   | NA      | NA      | NA                 |
| 142 | 79 | F | local<br>cutaneous<br>metastases   | lower leg           | MMnos         | NA   | NA      | NA      | NA                 |
| 143 | 81 | F | vulvar<br>recurrence               | vulva               | MMnos         | 10   | NA      | NA      | NA                 |
| 144 | 56 | F | local<br>cutaneous<br>recurrence   | lower leg           | SSMM          | 1,9  | NA      | NA      | NA                 |
| 145 | 56 | F | LN<br>metastases                   | sole of<br>foot     | ALMM          | 6,8  | +       | NA      | microsa<br>tellite |
| 146 | 92 | F | local<br>cutaneous<br>metastases   | lower leg           | NMM           | 3,2  | NA      | NA      | NA                 |
| 147 | 92 | F | local<br>cutaneous<br>metastases   | lower leg           | NMM           | 3,2  | NA      | NA      | NA                 |
| 148 | 42 | F | LN<br>metastases                   | back                | SSMM          | 1,2  | -       | NA      | regressi<br>ve     |

|     |    |   |                                       |           |                                   |      |    |    |                |
|-----|----|---|---------------------------------------|-----------|-----------------------------------|------|----|----|----------------|
| 149 | 57 | F | in transit, LN metastases             | lower leg | SSMM                              | 1    | NA | NA | NA             |
| 150 | 57 | F | local recurrence                      | lower leg | NMM                               | 5,7  | NA | NA | microsatellite |
| 151 | 80 | F | local cutaneous metastases            | lower leg | MMnos                             | NA   | NA | NA | NA             |
| 152 | 64 | F | local recurrence                      | lower leg | SSMM                              | 1,73 | NA | NA | NA             |
| 153 | 51 | F | abdominal metastases                  | upper arm | SSMM                              | 1,2  | NA | NA | NA             |
| 154 | 78 | F | local cutaneous metastases            | lower leg | SSMM                              | NA   | +  | NA | NA             |
| 155 | 78 | F | local cutaneous metastases            | lower leg | SSMM                              | NA   | +  | NA | NA             |
| 156 | 64 | F | local recurrence                      | arm       | cutaneous metastases (no primary) | NA   | NA | NA | NA             |
| 157 | 69 | F | in transit metastases                 | foot      | ALMM                              | NA   | NA | NA | NA             |
| 158 | 63 | F | lung, liver, bone, adrenal metastases | shoulder  | SSMM                              | 4,1  | +  | NA | NA             |

Legend: F (female), ALMM (acral lentiginous malignant melanoma), LN (lymph node), SSMM (superficial spreading malignant melanoma), NMM (nodular melanoma), MMnos (malignant melanoma not otherwise specified), NA (no data available)

**Appendix Table S2. Western blot quantifications from Figure 5 and Figure 6**

|                  | <b>Figure 5B (n=3)</b> |                |                |                |              |               |
|------------------|------------------------|----------------|----------------|----------------|--------------|---------------|
|                  | shCntl IOX2 -          | shCntl IOX2 +  | shBNIP3 IOX2 - | shBNIP3 IOX2+  | shATG5 IOX2- | shATG5 IOX2+  |
|                  | Mean ± SEM             | Mean ± SEM     | Mean ± SEM     | Mean ± SEM     | Mean ± SEM   | Mean ± SEM    |
| HIF-1a-OH/ACTIN  | 1.00 ± 0.00            | 0.06 ± 0.03*** | 0.44 ± 0.10*   | 0.21 ± 0.12*   | 0.51 ± 0.06* | 0.31 ± 0.14*  |
| HIF-1a/ACTIN     | 1.00 ± 0.00            | 3.89 ± 2.20    | 0.28 ± 0.03**  | 3.32 ± 0.86    | 0.95 ± 0.09  | 5.40 ± 1.63   |
| LDHA/ACTIN       | 1.00 ± 0.00            | 1.49 ± 0.34    | 0.28 ± 0.02*** | 1.06 ± 0.27    | 0.87 ± 0.06  | 1.78 ± 0.21   |
| HIF-1a-OH/HIF-1a | 1.00 ± 0.00            | 0.03 ± 0.01*** | 1.56 ± 0.28    | 0.06 ± 0.03*** | 0.55 ± 0.07* | 0.08 ± 0.05** |

|                  | <b>Figure 5D (n=3)</b> |                         |               |                |             |               |
|------------------|------------------------|-------------------------|---------------|----------------|-------------|---------------|
|                  | shCntl DFO -           | shCntl DFO +            | shBNIP3 DFO - | shBNIP3 DFO+   | shATG5 DFO- | shATG5 DFO+   |
|                  | Mean ± SEM             | Mean ± SEM              | Mean ± SEM    | Mean ± SEM     | Mean ± SEM  | Mean ± SEM    |
| HIF-1a-OH/ACTIN  | 1.00 ± 0.00            | 0.33 ± 0.18<br>(p=0.06) | 0.91 ± 0.27   | 0.27 ± 0.09*   | 1.03 ± 0.54 | 0.39 ± 0.24   |
| HIF-1a/ACTIN     | 1.00 ± 0.00            | 2.82 ± 0.69             | 0.60 ± 0.07   | 3.10 ± 0.44*   | 1.18 ± 0.25 | 3.68 ± 0.88   |
| LDHA/ACTIN       | 1.00 ± 0.00            | 1.57 ± 0.18             | 0.34 ± 0.03** | 0.81 ± 0.02*   | 0.86 ± 0.14 | 1.49 ± 0.40   |
| HIF-1a-OH/HIF-1a | 1.00 ± 0.00            | 0.10 ± 0.03**           | 1.48 ± 0.32   | 0.08 ± 0.02*** | 0.76 ± 0.25 | 0.09 ± 0.04** |

|                  | <b>Figure 5E (n=3)</b> |               |               |                |              |               |
|------------------|------------------------|---------------|---------------|----------------|--------------|---------------|
|                  | shCntl siScr           | shCntl siPHD2 | shBNIP3 siScr | shBNIP3 siPHD2 | shATG5 siScr | shATG5 siPHD2 |
|                  | Mean ± SEM             | Mean ± SEM    | Mean ± SEM    | Mean ± SEM     | Mean ± SEM   | Mean ± SEM    |
| HIF-1a-OH/ACTIN  | 1.00 ± 0.00            | 0.81 ± 0.06   | 0.89 ± 0.26   | 0.99 ± 0.35    | 1.03 ± 0.07  | 0.74 ± 0.20   |
| HIF-1a/ACTIN     | 1.00 ± 0.00            | 2.58 ± 0.31*  | 0.73 ± 0.12   | 2.39 ± 0.86    | 1.12 ± 0.25  | 2.21 ± 0.38   |
| LDHA/ACTIN       | 1.00 ± 0.00            | 2.03 ± 0.48   | 0.28 ± 0.10*  | 0.85 ± 0.20    | 1.12 ± 0.11  | 2.32 ± 0.42   |
| PHD2/ACTIN       | 1.00 ± 0.00            | 0.14 ± 0.02   | 1.63 ± 0.31   | 0.28 ± 0.02**  | 1.11 ± 0.17  | 0.17 ± 0.04** |
| HIF-1a-OH/HIF-1a | 1.00 ± 0.00            | 0.32 ± 0.04** | 1.20 ± 0.19   | 0.42 ± 0.03**  | 1.08 ± 0.37  | 0.36 ± 0.13*  |

|             | <b>Figure 6C (n=3)</b> |               |                |                          |                         |               |
|-------------|------------------------|---------------|----------------|--------------------------|-------------------------|---------------|
|             | shCntl BafA -          | shCntl BafA + | shBNIP3 BafA - | shBNIP3 BafA+            | shATG5 BafA-            | shATG5 BafA+  |
|             | Mean ± SEM             | Mean ± SEM    | Mean ± SEM     | Mean ± SEM               | Mean ± SEM              | Mean ± SEM    |
| NCOA4/ACTIN | 1.00 ± 0.00            | 11.44 ± 1.13* | 1.41 ± 0.10*   | 21.98 ± 5.43<br>(p=0.06) | 1.16 ± 0.04<br>(p=0.07) | 11.88 ± 1.17* |
| FTL/ACTIN   | 1.00 ± 0.00            | 0.24 ± 0.07** | 1.16 ± 0.50    | 0.85 ± 0.47              | 0.84 ± 0.27             | 0.32 ± 0.15*  |



| Figure 6F (n=4)  |              |                |                 |                 |              |                |
|------------------|--------------|----------------|-----------------|-----------------|--------------|----------------|
|                  | shCntl siScr | shCntl siNCOA4 | shBNIP3 siScr   | shBNIP3 siNCOA4 | shATG5 siScr | shATG5 siNCOA4 |
|                  | Mean ± SEM   | Mean ± SEM     | Mean ± SEM      | Mean ± SEM      | Mean ± SEM   | Mean ± SEM     |
| HIF-1a-OH/ACTIN  | 1.00 ± 0.00  | 0.85 ± 0.18    | 0.53 ± 0.06**   | 0.55 ± 0.10*    | 1.12 ± 0.27  | 0.60 ± 0.15    |
| HIF-1a/ACTIN     | 1.00 ± 0.00  | 1.13 ± 0.15    | 0.52 ± 0.10*    | 0.74 ± 0.10     | 1.25 ± 0.22  | 0.74 ± 0.08*   |
| LDHA/ACTIN       | 1.00 ± 0.00  | 1.19 ± 0.06*   | 0.22 ± 0.02**** | 0.32 ± 0.03***  | 1.08 ± 0.11  | 1.15 ± 0.09    |
| NCOA4/ACTIN      | 1.00 ± 0.00  | 0.22 ± 0.05*** | 2.22 ± 0.36*    | 0.36 ± 0.14*    | 1.13 ± 0.23  | 0.15 ± 0.10**  |
| HIF-1a-OH/HIF-1a | 1.00 ± 0.00  | 0.85 ± 0.18    | 1.29 ± 0.36     | 0.84 ± 0.16     | 0.88 ± 0.11  | 0.73 ± 0.14    |

All data was analyzed using a one-sample T test against shCntl untreated (5B, 5D, 6C) or shCntl siScr (5E, 6F) except shBNIP3 BafA- and shBNIP3 BafA+ in 6C that were analyzed using a Wilcoxon rank test against shCntl. \* p < 0.05, \*\* p < 0.01, \*\*\* p < 0.001, \*\*\*\* p < 0.0001.

In 6C, FTL shBNIP3 conditions were analyzed using a Wilcoxon test against shCntl Baf- whereas the rest were analyzed using a one sample T test against shCntl Baf-.

**Appendix Table S3. CE-ICP-MS values related to Figure 6B**

| Condition | Biological Replicate | Fe <sup>3+</sup> (µg/L) | Fe <sup>2+</sup> (µg/L) | Fe <sup>2+</sup> /Fe <sup>3+</sup> ratio |
|-----------|----------------------|-------------------------|-------------------------|------------------------------------------|
| shCntl    | E1                   | 288.44                  | 86.51                   | 0.30                                     |
| shCntl    | E2                   | 212.06                  | 85.95                   | 0.41                                     |
| shCntl    | E3                   | 347.54                  | 131.03                  | 0.38                                     |
| shBNIP3   | E1                   | 22.27                   | 96.30                   | 4.32                                     |
| shBNIP3   | E2                   | 41.47                   | 118.33                  | 2.85                                     |
| shBNIP3   | E3                   | 31.52                   | 82.97                   | 2.63                                     |
| shATG5    | E1                   | 68.82                   | 47.29                   | 0.69                                     |
| shATG5    | E2                   | 60.93                   | 16.98                   | 0.28                                     |
| shATG5    | E3                   | 55.17                   | 18.43                   | 0.33                                     |

**Appendix Table S4. CE-ICP-MS values related to Figure 6E**

| Condition       | Biological Replicate | Fe <sup>3+</sup> (µg/L) | Fe <sup>2+</sup> (µg/L) | Fe <sup>2+</sup> /Fe <sup>3+</sup> ratio |
|-----------------|----------------------|-------------------------|-------------------------|------------------------------------------|
| shCntl siScr    | E1                   | 25.60                   | 16.34                   | 0.64                                     |
| shCntl siScr    | E2                   | 42.19                   | 13.49                   | 0.32                                     |
| shCntl siScr    | E3                   | 53.64                   | 19.44                   | 0.36                                     |
| shCntl siScr    | E4                   | 18.96                   | 10.98                   | 0.58                                     |
| shBNIP3 si Scr  | E1                   | 11.55                   | 38.48                   | 3.33                                     |
| shBNIP3 si Scr  | E2                   | 12.99                   | 31.85                   | 2.45                                     |
| shBNIP3 si Scr  | E3                   | 56.02                   | 62.48                   | 1.12                                     |
| shBNIP3 si Scr  | E4                   | 15.50                   | 36.41                   | 2.35                                     |
| shATG53 si Scr  | E1                   | 10.66                   | 3.21                    | 0.30                                     |
| shATG53 si Scr  | E2                   | 13.32                   | 8.54                    | 0.64                                     |
| shATG53 si Scr  | E3                   | 37.72                   | 21.42                   | 0.57                                     |
| shATG53 si Scr  | E4                   | 28.31                   | 15.16                   | 0.54                                     |
| shCntl siNCOA4  | E1                   | 33.29                   | 13.70                   | 0.41                                     |
| shCntl siNCOA4  | E2                   | 24.95                   | 10.34                   | 0.41                                     |
| shCntl siNCOA4  | E3                   | 43.07                   | 26.58                   | 0.62                                     |
| shCntl siNCOA4  | E4                   | 29.39                   | 24.29                   | 0.83                                     |
| shBNIP3 siNCOA4 | E1                   | 38.36                   | 28.77                   | 0.75                                     |
| shBNIP3 siNCOA4 | E2                   | 39.74                   | 11.79                   | 0.30                                     |
| shBNIP3 siNCOA4 | E3                   | 38.44                   | 10.29                   | 0.27                                     |
| shBNIP3 siNCOA4 | E4                   | 42.00                   | 17.97                   | 0.43                                     |
| shATG53 siNCOA4 | E1                   | 8.30                    | 2.51                    | 0.30                                     |
| shATG53 siNCOA4 | E2                   | 51.98                   | 44.84                   | 0.86                                     |
| shATG53 siNCOA4 | E3                   | 50.97                   | 32.46                   | 0.64                                     |
| shATG53 siNCOA4 | E4                   | 15.71                   | 12.01                   | 0.76                                     |

**Appendix Table S5. Sequences of the qPCR primers**

| Gene                | Primer orientation | Sequence                     | Source  |
|---------------------|--------------------|------------------------------|---------|
| MURINE              |                    |                              |         |
| <i>Hprt</i>         | FW                 | TCCTCCTCAGACCGCTTTT          | Inhouse |
|                     | RV                 | CCTGGTTCATCATCGCTAATC        | Inhouse |
| <i>Ppib</i>         | FW                 | GGAGATGGCACAGGAGGAA          | Inhouse |
|                     | RV                 | GCCCGTAGTGCTTCAGCTT          | Inhouse |
| <i>Bnip3</i>        | FW                 | CCTGTGCGAGTTGGGTTT           | Inhouse |
|                     | RV                 | TTGCCATTGCTGAAGTGC           | Inhouse |
| <i>Hif1a</i>        | FW                 | GCACTAGACAAAGTTCACCTGAGA     | Inhouse |
|                     | RV                 | CGCTATCCACATCAAAGCAA         | Inhouse |
| <i>Glut1</i>        | FW                 | GACCCTGCACCTCATTGG           | Inhouse |
|                     | RV                 | GATGCTCAGATAGGACATCCAAG      | Inhouse |
| <i>Hk2</i>          | FW                 | AAGAGAACAAGGGCGAGGAG         | Inhouse |
|                     | RV                 | GGCAAATGGGGATGTTTC           | Inhouse |
| <i>Pkm1</i>         | FW                 | TGGACATGGTGTTCATCT           | Inhouse |
|                     | RV                 | CCTGGCTGTTTCTCCAGAC          | Inhouse |
| <i>Pkm2</i>         | FW                 | GTGACCTGGCATTGAGATT          | Inhouse |
|                     | RV                 | CGGAGTTCCTCGAATAGCTG         | Inhouse |
| <i>Pdk1</i>         | FW                 | GTGTTGCTGAAGCTCCTAAAGG       | Inhouse |
|                     | RV                 | TGTTCAAACCACGCCAAT           | Inhouse |
| <i>Mct1</i>         | FW                 | TTGCCCTTTGTCTACAACC          | Inhouse |
|                     | RV                 | CCTCCGCTTCTGTTCTTTG          | Inhouse |
| <i>Ldha</i>         | FW                 | ATCTTAATGAAGGACTTGGCGGAT     | Inhouse |
|                     | RV                 | AGCTTGGAGTTCGCAGTTACA        | Inhouse |
| <i>Ldhb</i>         | FW                 | CATTGCGTCCGTTGCAGATG         | Inhouse |
|                     | RV                 | GGAGGAACAAGCTCCCGTG          | Inhouse |
| <i>Mct4</i>         | FW                 | GACAGAGGCAGATACAGCGG         | Inhouse |
|                     | RV                 | GAGGGCTGCTTTCACCAAGA         | Inhouse |
| <i>Vegfa</i>        | FW                 | TTAAACGAACGTACTTGCAGATG      | Inhouse |
|                     | RV                 | AGAGGTCTGGTCCCGAAA           | Inhouse |
| <i>Egln2</i> (PHD1) | FW                 | GGTCCGTTGAGTGTAGAGCTG        | Inhouse |
|                     | RV                 | CAAGAGGCCATGACTCACCT         | Inhouse |
| <i>Egln1</i> (PHD2) | FW                 | CTGTGGAACAGCCCTTTTGG         | Inhouse |
|                     | RV                 | CGAGTCTCTGCGAATCCT           | Inhouse |
| <i>Egln3</i> (PHD3) | FW                 | TGTCTGGTACTTCGATGCTGA        | Inhouse |
|                     | RV                 | AGCAAGAGCAGATTCAGTTTTTC      | Inhouse |
| <i>Ncoa4</i>        | FW                 | TCCCAGTGTGATTTGGCCATGTGTTAGT | Inhouse |
|                     | RV                 | TGCACTGCAGGGTGCATAACATGGTAAA | Inhouse |

| Gene                   | Primer orientation | Sequence               | Source  |
|------------------------|--------------------|------------------------|---------|
| MURINE                 |                    |                        |         |
| <i>Map1lc3b</i> (LC3B) | FW                 | AGATGTTACCATACGCCCTTCT | Inhouse |
|                        | RV                 | TCAGAACCACCTTACAGAGAC  | Inhouse |
| <i>Sqstm1</i> (p62)    | FW                 | CTTCTGGGCAAGGAGGAGG    | Inhouse |
|                        | RV                 | CAACCAAGTCCCCATCCTCA   | Inhouse |

| Gene                  | Primer orientation | Sequence                          | Source                           |
|-----------------------|--------------------|-----------------------------------|----------------------------------|
| HUMAN                 |                    |                                   |                                  |
| <i>HPRT</i>           | FW                 | GACCAGTCAACAGGGGACAT              | Inhouse                          |
|                       | RV                 | GTGTCAATTATATCTTCCACAATCAAG       | Inhouse                          |
| <i>PPIB</i>           | FW                 | CCAACGCAGGCAAAGACACCAA            | (Capomaccio <i>et al</i> , 2011) |
|                       | RV                 | GCTCTCCACCTTCCGCACCA              |                                  |
| <i>BNIP3</i>          | FW                 | CTGGACGGAGTAGCTCCAAG              | Inhouse                          |
|                       | RV                 | CCGACTTGACCAATCCCATA              | Inhouse                          |
| <i>HIF1A</i>          | FW                 | TTTTTCAAGCAGTAGGAATTGGA           | Inhouse                          |
|                       | RV                 | GTGATGTAGTAGCTGCATGATCG           | Inhouse                          |
| <i>SLC2A1</i> (GLUT1) | FW                 | ATGATGCGGGAGAAGAAGGT              | Inhouse                          |
|                       | RV                 | TCGAAGATGCTCGTGGAGTA              | Inhouse                          |
| <i>HK2</i>            | FW                 | AAGGCTTCAAGGCATCTG                | (Jin <i>et al</i> , 2017)        |
|                       | RV                 | CCACAGGTCATCATAGTTCC              |                                  |
| <i>PKM2</i>           | FW                 | GTGCGAGCCTCAAGTCACTCCACA          | (Chu <i>et al</i> , 2015)        |
|                       | RV                 | TATAAGAAGCCTCCACGCTGCCCA          |                                  |
| <i>PDK1</i>           | FW                 | CTGTGATACGGATCAGAAACCG            | (Velpula <i>et al</i> , 2013)    |
|                       | RV                 | TCCACCAAACAATAAAGAGTGCT           |                                  |
| <i>LDHA</i>           | FW                 | AGCCCGATTCCGTTACCT                | (Daniele <i>et al</i> , 2015)    |
|                       | RV                 | CACCAGCAACATTCATTCCA              |                                  |
| <i>LDHB</i>           | FW                 | CTAGCTAGCCTAGTGAGCTCTAGGCTGTAG    | (Luo <i>et al</i> , 2013)        |
|                       | RV                 | ACGCGTCGACGCACACTACAATAGTTAATTTTA |                                  |
| <i>SLC16A3</i> (MCT4) | FW                 | GGGACTTCTACCCGGTTTGG              | Inhouse                          |
|                       | RV                 | CATGTGCCTCTGGACCATGT              | Inhouse                          |
| <i>VEGFA</i>          | FW                 | TTAACCGAACGTA CTG CAGATG          | Inhouse                          |
|                       | RV                 | GAGAGATCTGGTCCCGAAA               | Inhouse                          |
| <i>EGLN1</i> (PHD2)   | FW                 | AGGCGATAAGATCACCTGGAT             | Inhouse                          |
|                       | RV                 | TTCGTCCGGCCATTGATTTTG             | Inhouse                          |

## Appendix references

- Capomaccio S, Cappelli K, Spinsanti G, Mencarelli M, Muscettola M, Felicetti M, Verini Supplizi A & Bonifazi M (2011) Athletic humans and horses: comparative analysis of interleukin-6 (IL-6) and IL-6 receptor (IL-6R) expression in peripheral blood mononuclear cells in trained and untrained subjects at rest. *BMC Physiol.* **11**: 3
- Chu B, Wang J, Wang Y & Yang G (2015) Knockdown of PKM2 induces apoptosis and autophagy in human A549 alveolar adenocarcinoma cells. *Mol. Med. Rep.* **12**: 4358–4363
- Daniele S, Giacomelli C, Zappelli E, Granchi C, Trincavelli ML, Minutolo F & Martini C (2015) Lactate dehydrogenase-A inhibition induces human glioblastoma multiforme stem cell differentiation and death. *Sci. Rep.* **5**: 15556
- Jin F, Wang Y, Zhu Y, Li S, Liu Y, Chen C, Wang X, Zen K & Li L (2017) The miR-125a/HK2 axis regulates cancer cell energy metabolism reprogramming in hepatocellular carcinoma. *Sci. Rep.* **7**: 3089
- Luo D, Wilson JM, Harvel N, Liu J, Pei L, Huang S, Hawthorn L & Shi H (2013) A systematic evaluation of miRNA:mRNA interactions involved in the migration and invasion of breast cancer cells. *J. Transl. Med.* **11**: 57
- Velpula KK, Bhasin A, Asuthkar S & Tsung AJ (2013) Combined targeting of PDK1 and EGFR triggers regression of glioblastoma by reversing the Warburg effect. *Cancer Res.* **73**: 7277–7289
